1 *G3: Genes, Genomes, Genetics*

2

3 Genomic prediction accounting for genotype by environment  
4 interaction offers an effective framework for breeding simultaneously  
5 for adaptation to an abiotic stress and performance under normal  
6 cropping conditions in rice

7

8 Ben Hassen M<sup>†,‡</sup> <sup>1</sup>, Bartholomé J<sup>†,‡</sup> <sup>1</sup>, Valè G<sup>§</sup>, Cao TV<sup>†,‡</sup> <sup>1</sup>, Ahmadi N<sup>†,‡</sup>

9 <sup>†</sup> CIRAD, UMR AGAP, F-34398 Montpellier, France.

10 <sup>‡</sup> AGAP, Univ Montpellier, CIRAD, INRA, Montpellier SupAgro, Montpellier, France.

11 <sup>§</sup> CREA- Council for Agricultural Research and Economics, Research Center for Cereal and  
12 Industrial Crops, S. S. 11 to Torino Km 2.5, Vercelli, 13100, Italy

13 <sup>1</sup> These authors contributed equally to the work

14

15

16

Ben Hassen *et al.*, Genomic prediction accounting for genotype by environment interaction

17 **Running title:** Genomic selection in rice

18 **Keywords:** Rice, genomic selection, progeny prediction, G×E interaction, alternate wetting and  
19 drying (AWD).

20 **Corresponding author:** Nourollah Ahamadi

21 TA-A 108/01, Avenue Agropolis 34398 Montpellier Cedex 5, France

22 phone: +33 4 67 61 57 41 ; email: [nourollah.ahmadi@cirad.fr](mailto:nourollah.ahmadi@cirad.fr)

23

## 24 Abstract

25 Developing rice varieties adapted to alternate wetting and drying water management is crucial  
26 for the sustainability of irrigated rice cropping systems. Here we report the first study exploring  
27 the feasibility of breeding rice for adaptation to alternate wetting and drying using genomic  
28 prediction methods that account for genotype by environment interactions. Two breeding  
29 populations (a reference panel of 284 accessions and a progeny population of 97 advanced lines)  
30 were evaluated under alternate wetting and drying and continuous flooding management  
31 systems. The accuracy of genomic prediction for response variables (index of relative  
32 performance and the slope of the joint regression) and for multi-environment genomic  
33 prediction models were compared. For the three traits considered (days to flowering, panicle  
34 weight and nitrogen-balance index), significant genotype by environment interactions were  
35 observed in both populations. In cross validation, prediction accuracy for the index was on  
36 average lower (0.31) than that of the slope of the joint regression (0.64) whatever the trait  
37 considered. Similar results were found for across population validation (progeny validation).  
38 Both cross-validation and progeny validation experiments showed that the performance of  
39 multi-environment models predicting unobserved phenotypes of untested entries was similar  
40 to the performance of single environment models with differences in accuracy ranging from -  
41 6% to 4% depending on the trait and on the statistical model concerned. The accuracy of multi-  
42 environment models predicting unobserved phenotypes of entries evaluated under both water  
43 management systems outperformed single environment models by an average of 30%. Practical  
44 implications for breeding rice for adaptation to AWD are discussed.

45

46

## 47 Introduction

48 Rice is the world's most important staple food and will continue to be so in the coming  
49 decades. In the future, the necessary increases in rice production to meet demand will have to  
50 come mainly from an increase in yield per unit of land, water and other resources (CGIAR  
51 Research Program on Rice 2016). At the same time, 15–20 million ha of rice lands will suffer  
52 some degree of water scarcity (Tuong and Bouman 2003; Mekonnen and Hoekstra 2016). The  
53 predicted increase in water scarcity threatens the sustainability of rice production (Rijsberman  
54 2006). It is thus crucial to develop agronomic practices that reduce water use while maintaining  
55 or increasing yields. A concomitant challenge is to adapt rice varieties to these water-saving  
56 agronomic practices by improving their performance under water-limited conditions.

57 In recent decades, different water management systems have been developed with the aim  
58 of reducing water consumption by irrigated rice (Tuong *et al.* 2005; Yang *et al.* 2007). Among  
59 them, the alternate wetting and drying (AWD) system, in which paddy fields are subjected to  
60 intermittent flooding with dry periods managed by soil water potential measurements, is one of  
61 the most widely used (Linquist *et al.* 2015; Lampayan *et al.* 2015). A meta-analysis of 56 studies  
62 comparing AWD with continuous flooding (CF) reported an overall decrease in yield of about  
63 5% (Carrijo *et al.* 2017). However, marked variations were observed mainly depending on the  
64 severity of the drying phase (*i.e.* the soil moisture at the end of each drying cycle) and on soil  
65 characteristics (Lampayan *et al.* 2015; Carrijo *et al.* 2017). Significant differences in genotypic  
66 responses to AWD, measured by changes in grain yield, have also been reported and attributed  
67 to modified biomass partitioning (Bueno *et al.* 2010). Root architectural traits such as the  
68 number of nodal roots and root dry weight at a depth of 10-20 cm 22-30 days after transplanting  
69 also significantly contribute to yield stability under AWD (Sandhu *et al.* 2017). Genome wide  
70 association analysis using a diversity panel revealed AWD-specific associations for several

71 agronomic traits including days to flowering, plant height, tillering, and panicle and seed  
72 characteristics (Volante et al. 2017). Thus, rice adaptation to AWD appears to involve typical  
73 complex traits, whose improvement requires genome-wide breeding approaches that account  
74 for genotype by environment (G×E) interactions, i.e. the amplitude of the response of the  
75 genotypes to a shift from CF management to the AWD system.

76 In plant breeding, G×E interactions are usually assessed in multi-environment trials and  
77 expressed as a change in the relative performance of genotypes in different environments, with  
78 or without change in the ranking of the genotypes (Freeman 1973). G×E analysis plays a  
79 fundamental role in assessing genotype stability, in predicting the performance of untested  
80 genotypes and in maximizing response to selection. Statistical methods for assessing G×E  
81 interactions and estimating their sizes and opportunities to exploit them are widely discussed in  
82 the literature (Freeman 1973; Cooper et al. 1993;; Malosetti et al. 2013; Elias et al. 2016; de  
83 Leon et al. 2016). One of the earliest and most widely used methods is linear regression of the  
84 performance (often of yield) of the individual genotype on the mean performances of all  
85 genotypes evaluated in each test environment (Yates and Cochran 1938). The method, known  
86 as *joint regression analysis*, was further formalized by Eberhart and Russel (1966) to enable  
87 testing of the significance of deviation of individual regression from the general linear  
88 component of G×E. Most evaluations of the effect of the environment on performance  
89 undertaken for the purpose of plant breeding rely on multi-environmental field testing that  
90 represents target production environments or a target population of environments (Cooper and  
91 Hammer 1996). One specific case of G×E experiments is managed-environment trials that aim  
92 to assess the effect of particular environmental variables (e.g., abiotic stresses) or cropping  
93 practices (e.g. fertilizer, irrigation, etc.) that influence crop performance in the production  
94 environment concerned (Cooper and Hammer 1996). A still more specific case of G×E  
95 experiments is managed abiotic stress trials that aim to provide a measure of genotypic response

96 to stress based on yield loss under stress compared with under normal conditions. Several indexes  
97 have been proposed to evaluate the stress intensity and genotypic response in such experiments,  
98 mainly in the context of selection for drought tolerance (Fischer and Maurer 1978; Rosielle and  
99 Hamblin 1981; Fischer et al. 2003).

100 With the advent of molecular markers, new G×E analysis methods have been developed  
101 based on linear mixed models that connect the differential sensitivity of genotypes to  
102 environments to particular regions of the plant genome and to specific biological mechanisms  
103 ( Malosetti et al. 2004; Boer et al. 2007; van Eeuwijk et al. 2010). More recently, the potential  
104 of genomic selection (GS) to accelerate the pace of genetic gains in major field crops has  
105 encouraged the development of multi-environment models for genomic prediction. The first  
106 statistical framework using a linear mixed model to model G×E for the purpose of genomic  
107 prediction was proposed by Burgueño et al. (2012). It extended the single-trait, single-  
108 environment genomic best linear unbiased prediction (GBLUP) model to a multi-environment  
109 context. Jarquín et al. (2014) proposed a method of modeling interactions between a high-  
110 dimensional set of markers and environmental that incorporates genetic and environmental  
111 gradients, as random linear functions (reaction norm) of markers and environmental covariates,  
112 respectively. Lopez-Cruz et al. (2015) proposed a marker × environment interaction (M×E) GS  
113 model that can be implemented using regression of phenotypes on markers or using co-variance  
114 structures (a GBLUP-type model). Cuevas et al. (2016) further developed this approach by  
115 using a non-linear (Gaussian) kernel to model the G×E: the reproducing kernel Hilbert space  
116 with kernel averaging and the Gaussian kernel with the bandwidth estimated using an empirical  
117 Bayesian method. Crossa et al. (2016) extended the M×E model using priors that produce  
118 shrinkage (Bayesian ridge regression) or variable selection (BayesB), and reported better  
119 prediction performances for these models compared to single environment and across-  
120 environment models. The latest multi-environment genomic prediction models fall back on a

121 Bayesian approach (Cuevas et al. 2017). Application of these methods to one maize and four  
122 wheat CIMMYT data sets showed that models with G×E always have higher prediction ability  
123 than single-environment models, regardless of the genetic correlation between environments.  
124 The predictive ability of these Bayesian methods was also generally better than that obtained  
125 with the G×E models proposed by Lopez-Cruz et al. (2015) and Cuevas et al. (2016), when  
126 applied to the same datasets.

127 In the present study, we evaluated the effect of AWD on the performance of two rice  
128 breeding populations: a reference panel and a population of advanced lines both genotyped with  
129 32 k SNP markers. Our general objective was to explore the feasibility of genomic selection for  
130 the adaptation of rice to AWD in the framework of a pedigree breeding scheme. Our specific  
131 objectives were to: (i) assess expression of the response of the above-mentioned populations to  
132 AWD compared to the CF irrigation system, and (ii) compare the performance of different  
133 genomic prediction models that include G×E interactions in answering the two well-known  
134 issues relevant in breeding programs: predicting unobserved phenotypes of untested lines and  
135 predicting unobserved phenotypes of lines that have been evaluated in some environments but  
136 not others. The two issues are analyzed in the context of intra-population prediction (cross-  
137 validation experiments), and across-populations prediction (progeny-validation), as the  
138 population of advanced lines was derived from biparental crosses between some of the members  
139 of the diversity panel.

## 140 Material and method

### 141 Field trial and phenotyping

142 The plant material used in this study comprised a reference population (RP) of 284  
143 accessions belonging to the rice *japonica* subspecies, and a progeny population (PP) of 97

144 advanced (F<sub>5</sub>-F<sub>7</sub>) inbred lines. The RP is representative of the working collection of the  
145 Research Centre for Cereal and Industrial Crops (CREA), Vercelli, Italy. The PP was derived  
146 from bi-parental crosses involving 31 accessions of RP, using a pedigree breeding scheme.  
147 More information on the two populations is provided in Ben Hassen *et al.* (2017). The two  
148 populations were phenotyped separately for two consecutive years at the experimental station  
149 of the CREA (45°19'24.00"N; 8°22'26.28"E; 134 m asl.): in 2012 and 2013 for RP and in 2014  
150 and 2015 for PP. In each year, the phenotyping experiment included two independent trials  
151 corresponding to the two water management systems tested: CF and AWD. For the  
152 conventional CF water management system, rice was dry seeded and the field was flooded with  
153 10-15 cm of water at the 3-4 leaf stage (typically 30 days after sowing) and maintained flooded  
154 until mid-maturity. For the AWD, after initial flooding at the 3-4 leaf stage, the field was  
155 subjected to intermittent drying periods. The soil water potential was maintained above -30 kPa  
156 by gravity irrigation whenever the soil moisture reached this threshold. The soil water potential  
157 was monitored by a set of six tensiometers distributed throughout the field and inserted to a  
158 depth of 20 cm. For each population and each year, the two water management systems were  
159 conducted in two fields separated by a distance of about 100 m to avoid interference with  
160 respect to the water regime. The other soil characteristics were identical (sand 47.8%, loam  
161 42.8%, clay 9.4%; pH-H<sub>2</sub>O 6.4). The experimental design, which was identical in the two  
162 conditions, was a complete randomized design with three replicates for RP and a complete  
163 randomized block design with three replicates for the PP. The target traits for both RP and PP  
164 were days to flowering (FL), panicle weight (PW), and the nitrogen balance index (NI) as  
165 described in Ben Hassen *et al.* (2017).

## 166 Modeling of phenotypic data

167 Phenotypic data for each condition in the RP and the PP were analyzed using mixed models.  
168 In order to identify possible outliers among individual data points, a diagnostic analysis based



169 on restricted likelihood distance was implemented, for details see Ben Hassen *et al.* (2017).  
170 This analysis led to the elimination of one accession in the RP in AWD 2012 and 2013  
171 experiments, one data point for FL in AWD-2012, and one data point for PW in AWD-2013.  
172 The discarded data were considered as missing in the following steps of the analysis. The  
173 following mixed models were applied to obtain adjusted means per genotype:

174 
$$Y_{ijk}^m = \mu^m + y_i^m + g_j^m + gy_{ji}^m + \varepsilon_{ijk}^m \quad (\text{RP model 1})$$

175 
$$Y_{ijkl}^m = \mu^m + y_i^m + yr_{ik}^m + g_j^m + gy_{ji}^m + \varepsilon_{ijkl}^m \quad (\text{PP model 1})$$

176 where  $Y^m$  is the observed phenotype for the water management system  $m$ ;  $\mu^m$  the overall mean;  
177  $y^m$  the year as fixed effect;  $yr^m$  the within year replication as fixed effect;  $g^m$  the genotype as  
178 random effect,  $gy^m$  the interaction between genotype and year as random effect; and  $\varepsilon^m$  the  
179 residual. The analysis was performed with the *proc mixed* procedure of SAS 9.2 (SAS Institute,  
180 Cary NC, USA); the method of estimation for the variance components was the restricted  
181 maximum likelihood (REML). The formula by Holland *et al.* (2003) was used to estimate broad  
182 sense heritability ( $H^2$ ) as well as the corresponding standard error (SE) for each trait and each  
183 water management system in each population:

184 
$$H^2 = \frac{\sigma_g^2}{\sigma_g^2 + \frac{\sigma_{gy}^2}{ny} + \frac{\sigma_e^2}{nr}},$$

185 where  $\sigma_g^2$ ,  $\sigma_{gy}^2$  and  $\sigma_e^2$  are the variance components associated with the genotype, the interaction  
186 between genotype and year and the residual, respectively.  $ny$  is the harmonic mean of the  
187 number of years per accession and  $nr$ , the harmonic mean of the number of plots across years  
188 per accession. Conditional coefficients of determination ( $R^2$ ) were also computed using the  
189 methodology described by Nakagawa and Schielzeth (2013). The adjusted means per water  
190 management system ( $\hat{Y}_j^m = \hat{\mu}^m + \hat{g}_j^m + \hat{gy}_{ji}^m$ ) extracted from the model were used as  
191 phenotypes in the following steps.

192 For each trait, genetic correlations ( $r_G$ ) between values measured under the two water  
193 management systems were calculated (Cooper and DeLacy 1994; Cooper and Hammer 1996).  
194 The confidence interval of  $r_G$  was obtained by using Fisher transformation of the estimated  
195 correlation ( $\hat{Z} = 0.5 (\ln(1 + \hat{r}_G) - \ln(1 - \hat{r}_G))$ ), estimating the lower and upper bounds of  $\hat{Z}$   
196 ( $Z_{1,2} = \hat{Z} \pm u_{1-\frac{\alpha}{2}} \sqrt{\frac{1}{N_P-3}}$ , with  $\alpha = 0.05$ , and  $N_P = 284$  and  $97$ , for RP and PP respectively),  
197 and back transforming the  $\hat{z}_1$  and  $\hat{z}_2$  bounds into  $\hat{r}_1$  and  $\hat{r}_2$ . The ratio of correlated response to  
198 selection under continued flooding ( $CR_{CF}$ ) and the direct response under alternate watering and  
199 drying ( $DR_{AWD}$ ) was calculated as:

200 
$$\frac{CR_{CF}}{DR_{AWD}} = r_G \sqrt{\frac{H_{CF}^2}{H_{AWD}^2}}$$
 (Falconer 1989) where  $r_G$  is the genotypic correlation defined above,

201 and  $H_{AWD}^2$  and  $H_{CF}^2$  represent the heritability of the trait under AWD and CF, respectively.

202 In addition to models for each condition, a model gathering data from the two water  
203 management systems was also adjusted in order to test the significance of the interaction  
204 between water management and genotypes:

205 
$$Y_{ijkl} = \mu + m_i + y_j + my_{ij} + g_k + gm_{ik} + gy_{jk} + gmy_{ijk} + \varepsilon_{ijkl} \quad (\text{RP model 2})$$

206 
$$Y_{ijkln} = \mu + m_i + y_j + my_{ij} + myr_{ijl} + g_k + gm_{ik} + gy_{jk} + gmy_{ijk} + \varepsilon_{ijkln} \quad (\text{PP model 2})$$

207 The same notation was used as for the model for each condition with additional fixed and  
208 random effects:  $m$  the water management as fixed effect;  $my$  the water management and year  
209 interaction as fixed effect;  $myr$  the replication within water management and year as fixed  
210 effect;  $gm$  the interaction between genotype and water management as random effect; and  $gmy$   
211 the interaction between genotype, water management and year as random effect. The analyses  
212 were performed with the *proc mixed* procedure of SAS 9.2 (SAS Institute, Cary NC, USA) with  
213 REML.

214

## 215 Evaluation of genotypic response to water management systems

216 The genotypic response to AWD water management was estimated in two ways using  
217 adjusted means. First, an index of relative performance was computed as follows:

218  $I_j = \frac{\hat{Y}_j^{AWD} - \hat{Y}_j^{CF}}{\hat{Y}_j^{CF}}$ , where  $\hat{Y}_j^{AWD}$  and  $\hat{Y}_j^{CF}$  correspond to the adjusted means of accession  $j$  under

219 AWD and CF water managements, respectively. This index was also calculated at population  
220 level to assess the intensity of stress caused by AWD water management compared to CF:  $I =$

221  $\frac{\overline{\hat{Y}^{AWD}} - \overline{\hat{Y}^{CF}}}{\overline{\hat{Y}^{CF}}}$  where  $\overline{\hat{Y}^{AWD}}$  and  $\overline{\hat{Y}^{CF}}$  are the average performances of all genotypes within each

222 population under AWD and CF, respectively. Second, the slope  $\beta_j$  was computed as defined in

223 the joint regression equation:  $\hat{Y}_j^m = \mu_j + \beta_j \theta_m + \varepsilon_{jm}$ , where  $\hat{Y}_j^m$  is the adjusted mean of the

224 genotype  $j$  in the water management  $m$ ;  $\theta_m$  is the environmental index calculated as the mean

225 value of all genotypes in water management  $m$ ;  $\mu_j$  is the intercept of the regression line of

226 genotype  $j$ ; and  $\varepsilon_{jm}$  is the residual.

## 227 Genotypic data

228 The method used to genotype both RP and PP populations is detailed in Ben Hassen *et al.*

229 (2017). It relies on the genotyping by sequencing protocol developed by Elshire *et al.* (2011).

230 Sequencing was performed with a Genome Analyzer II (Illumina, Inc., San Diego, USA). The

231 different steps of analysis (raw data filtering, sequence alignment, SNP calling and imputation)

232 were performed with TASSEL v3.0 and the associated GBS pipeline (Glaubitz *et al.* 2014). A

233 working set of 32,066 SNPs was obtained with a heterozygosity rate  $< 5\%$  and minor allele

234 frequency (MAF)  $> 5\%$ .

## 235 Statistical models for genomic prediction

### 236 Single environment models

237 To predict the genomic estimated breeding values within each water management system,  
238 hereafter referred to as single environment, two different kernel regression models were used.  
239 The first model, which relies on a linear kernel, was the GBLUP as it is one of the most popular  
240 methods for genomic prediction (Van Raden 2008). For this model, the kernel matrix ( $K$ ) was  
241 computed as  $K = XX'$ ,  $X$  being the centered genotype matrix (-1, 0, 1) with  $N \times P$  dimension,  
242 where  $N$  is the number of genotypes and  $P$  the number of markers. The second model, which is  
243 based on reproducing kernel Hilbert space (RKHS) approaches, used a Gaussian kernel  
244  $K(x_i, x_j) = \exp(-h \|x_i - x_j\|^2)$  to build the kernel matrix between the marker genotype  
245 vectors  $x_i$  and  $x_j$ , where  $(i, j) \in \{1, \dots, N\}^2$ . The bandwidth parameter  $h$  was estimated using  
246 the method described by Pérez-Elizalde et al. (2015) based on a Bayesian method that relies on  
247 the estimation of the mode of the joint posterior distribution of  $h$  and a form parameter  $\phi$ . We  
248 used the R function *margh.fun* provided by Pérez-Elizalde et al. (2015) with a gamma prior  
249 distribution for  $h$ , with a shape parameter equal to 3, and a scale parameter equal to 1.5.

### 250 Multi-environment models

251 To predict the genomic estimated breeding values with data from the two water management  
252 systems, hereafter referred to as multi-environment prediction, we used the statistical models  
253 described above with extensions that integrate environmental effects. In the extended GBLUP  
254 model, the effects of  $m$  environments, and the effects of the  $P$  markers are separated into two  
255 components: the main effect of the markers for all the environments and the effect of the  
256 markers for each environment (Lopez-Cruz et al. 2015). For RKHS, we used two extended  
257 models incorporating  $G \times E$ : RKHS-1 corresponding to the “Empirical Bayesian–Genotype  $\times$   
258 Environment Interaction Model” proposed by Cuevas et al. (2016), and RKHS-2 corresponding

259 to the environmental model (3) proposed by Cuevas et al. (2017). Like the extended GBLUP,  
260 the first model (RKHS-1) considers the effects of  $m$  environments, and the effects of the  
261 markers are separated into a main effect for all the environments and an effect specific to each  
262 environment:

$$263 \quad y = \mu + u_o + u_E + \varepsilon$$

264 In this mixed model,  $y$  is the response vector,  $\mu$  is the overall intercept,  $u_o$  captures the  
265 marker information among environments, and  $u_E$  accounts for the marker information in each  
266 environment. The random effects  $u_o$  follow a multivariate normal distribution with mean zero  
267 and a variance–covariance matrix  $\sigma_u^2 K_o$ ,  $K_o$  constructed with the Gaussian kernel from the  
268 marker matrix  $X_o$ .

269 The latter model (RKHS-2), considers that the performances of accessions in different  
270 environments are correlated such that there is a genetic correlation between environments that  
271 can be modeled with matrices of order  $m \times m$ ,  $m$  being the number of environments:

$$272 \quad y = \mu + u + f + \varepsilon$$

273 In this mixed model,  $y$  is the response vector,  $\mu$  is the vector with the intercept of each  
274 environment,  $u$  the random vector of individual genetic values,  $f$  the genetic effects associated  
275 with individuals that were not accounted for in component  $u$ , and  $\varepsilon$  the random vector of the  
276 error.  $u$ ,  $f$  and  $\varepsilon$  are independent and normally distributed. For more methodological details  
277 concerning the extended GBLUP, RKHS-1 and RKHS-2 statistical models please refer to  
278 Lopez-Cruz et al. (2015), Cuevas et al. (2016) and to Cuevas et al. (2017), respectively.

## 279 Implementation of the models

280 Analyses were performed in the R 3.4.2 environment (R Core Team 2017) with the R  
281 packages *BGLR* 1.0.5 (Pérez and de los Campos 2014) and *MTM* 1.0.0 (De los Campos and

Ben Hassen *et al.*, Genomic prediction accounting for genotype by environment interaction

282 Grüneberg 2018). For both packages, 35,000 iterations for the Gibbs sampler were used. For  
283 the inference, 3,000 samples were used after removing the first 5,000 samples (burn-in) and  
284 keeping one in ten samples to avoid auto-correlation (thinning). Convergence of Markov chain  
285 Monte Carlo algorithm was assessed for all parameters of the models with Gelman-Rubin tests  
286 (Gelman and Rubin 1992) using the R-package *coda* 0.19-1 (Plummer et al. 2006).

## 287 [Assessing genomic prediction accuracy](#)

288 Prediction accuracy for the three traits and their related response to water management  
289 (index and slope) were assessed with two different validation schemes. The first scheme used  
290 only the RP with random partitions and is referred to hereafter as cross-validation. The second  
291 validation scheme used information from the RP to predict the performance of the PP (referred  
292 as progeny validation). The details of these two validation schemes are explained below.

## 293 [Cross-validation within the reference population](#)

294 Different types of random partitions were performed depending on the phenotypic and the  
295 genotypic information used in the statistical model. For traits in a single environment and for  
296 response variables, 80% of the 284 accessions (i.e. 227 accessions) of the RP were used as the  
297 training set and the remaining 20% (57 accessions) was used as the validation set. For multi-  
298 environment models, two different methods of cross-validation were applied. The first method  
299 (M1), which resembled what was done in the single environment, used 80% of the observations  
300 as a training set and the remaining 20% as the validation set and assumed that phenotypic  
301 observations for the two environments are available for the individuals composing the training  
302 set while no phenotypic data are available for the individuals in the validation set. M1  
303 corresponds to the situation when the phenotypes of newly generated individuals have to be  
304 predicted based only on their genotypic information (Burgueño et al., 2012). The second  
305 method (M2) also used 80% of the observations as a training set and the remaining 20% as the

306 validation set but assumed that at least one observation in one environment was available for  
307 the individuals in both the training set and the validation set. M2 corresponds to the situation  
308 when phenotypes in one environment have to be predicted with genotypic information and  
309 phenotypes from the other environment (Burgueño et al. 2012).

310 One hundred replicates were computed for all random partitioning in the training and  
311 validation sets. The prediction accuracy of each partition was calculated as the Pearson  
312 correlation coefficient between predictions and phenotypes in the validation set. For multi-  
313 environment models, the correlation was calculated within each environment. For each trait  
314 (FL, NI and PW) and each statistical model (GBLUP, RKHS-1 and RKHS-2), the same  
315 partitions were used to compute the prediction accuracy. The resulting estimates of prediction  
316 accuracy were averaged and the associated standard error was calculated.

317 To analyze the sources of variation of the prediction accuracy, the accuracy ( $r$ ) of each  
318 prediction experiment was transformed into a Z-statistic using the equation:  $Z =$   
319  $0.5 [\ln(1 + r) - \ln(1 - r)]$  and used as a dependent variable in an analysis of variance. A  
320 separate analysis was performed for each trait. After estimating the confidence limits and means  
321 for Z, these were transformed back to  $r$  variables.

## 322 Progeny validation across populations

323 For progeny validation, the model was trained on the RP in order to predict the performance  
324 of the PP based on genotypic information. Three validation scenarios were evaluated. In the  
325 first scenario (S1) only the 31 parental lines were used as the training set. In the second scenario  
326 (S2), the CDmean method (Rincent et al. 2012) was used to select 100 accessions in the RP for  
327 the training set. In the third scenario (S3), all the RP accessions were included in the training  
328 set. In all three scenarios, the validation set was made up of all the PP lines. Like for cross-

329 validation, prediction accuracy was calculated as the Pearson correlation coefficient between  
330 predictions and phenotypes in the validation set.

### 331 [Data Availability](#)

332 The genotypic and phenotypic data are available in the TropGene database in the tab “Studies”  
333 as “GS-Ruse”: To access the TropGene database go to  
334 <http://tropgenedb.cirad.fr/tropgene/JSP/interface.jsp?module=RICE>).

335

## 336 [Results](#)

### 337 [Analysis of the phenotypic variations and responses to water management](#)

338 The partitioning of the observed phenotypic variation into different sources of variation via  
339 the mixed model analysis is shown in Table S1. Models were adjusted separately for each  
340 population (RP and PP) and each water management system (CF and AWD). Conditional  $R^2$   
341 ranged from 0.33 to 0.96, indicating moderate to good fit of the model (Table 1). The lowest  $R^2$   
342 values were obtained for NI trait in both populations and both conditions. The highest  $R^2$  values  
343 were obtained for FL. Whatever the trait or water management system considered, the genotype  
344 contributed significantly to the phenotypic variation in each population. A higher contribution  
345 of the genotype effect to the phenotypic variation was observed for FL compared to NI and to  
346 a lesser extent to PW. Broad-sense heritability ( $H^2$ ) tended to confirm this trend (Table 1).  
347 Indeed, depending on the population and the condition,  $H^2$  ranged from 0.85 to 0.94 for FL,  
348 from 0.75 to 0.90 for PW, and from 0.56 to 0.77 for NI. A slight increase in  $H^2$  was observed  
349 in CF water management compared to in AWD for FL and PW in RP. There was no significant  
350 difference in PP.



351 The three traits investigated exhibited normal distribution in the RP and PP under both AWD  
352 and FC (Figure 1). The AWD water management resulted in medium intensity stress for FL  
353 (7.4% and 10.8% for RP and PP, respectively) and NI (-15.6% and -7.6%), and in rather severe  
354 stress intensity for PW (-26.6% and -27.9%). On average, both populations flowered  
355 significantly later under AWD than CF. The average FL values were 100.3 (102.8) in AWD  
356 and 93.4 (92.9) in CF, for RP and (PP). Conversely, significantly lower NI and PW values were  
357 observed in AWD compared to CF in both populations. For PW, the average differences  
358 between the two water management systems were 89.4 g for RP and 77.7 g for PP. For NI, in  
359 addition to differences in the average performance of the two water management systems,  
360 significant differences in distribution were also observed between RP and PP, for the extent of  
361 diversity, much larger for the RP, and for the frequency of individuals with low NI, much higher  
362 in the PP (Figure S1).

363 Partitioning of the phenotypic variation from the two water management systems into  
364 different sources of variation revealed the existence of significant interactions between  
365 genotypes and water management systems in both RP and PP, for all traits except FL in RP  
366 (Table S2). For all traits and populations, the ranking of the individuals was affected by water  
367 management and the Spearman's rank correlation coefficients between traits values under the  
368 two water management systems were medium to high (Figure 2). As a result, for each trait the  
369 ratio of correlated response to selection under FC, relative to direct response to selection under  
370 AWD, ranged from medium (0.56 and 0.75 for NI) to very high (0.98 and 0.90 for FL),  
371 suggesting indirect selection for adaptation to AWD is feasible (Table 1).

372 The two computed variables (index and slope) characterizing the accessions' response to  
373 AWD, revealed a Gaussian distribution for the three phenotypic traits considered (Figure S1).  
374 An ANOVA of these computed variables revealed significant genotype effects on the three  
375 traits in both RP and PP populations (Table S3). By construction, the correlations between

376 phenotypic values per condition and the slope were higher than those with the index whatever  
377 the trait and the population considered. Interestingly, the index behaved differently in each trait  
378 (Figure S1). For FL, low correlations were found either with AWD or CF. For NI, higher  
379 correlations were found with CF (- 0.51 for RP and - 0.58 for PP) than with AWD (0.39 for RP  
380 and 0.13 for PP). For PW, correlations were higher with AWD (0.42 for RP and 0.71 for PP)  
381 than with CF (- 0.23 for RP and 0.24 for PP). For the three traits considered, there was almost  
382 no correlation between the index and the slope variables (Figure S1): FL (0.12 for RP and 0.17  
383 for PP), NI (0.-0.16 for RP and -0.31 for PP) and PW (-0.03 for RP and 0.04 for PP).

#### 384 Accuracy of genomic prediction for the response variables

##### 385 Prediction accuracy in the reference population

386 The average prediction accuracies obtained for the two response variables were compared  
387 with those obtained for the observed variables in each water management system considered as  
388 references (Table 2). The overall mean accuracy for the observed variables (the three traits  
389 under the two water management systems), and for the response variables, was 0.54 but the  
390 range extended from -0.12 to 0.88, depending on the prediction model, the trait and the type of  
391 variable (**Erreur ! Source du renvoi introuvable.**, Table S4). The most significant factor  
392 influencing accuracy was the type of variable (Table 2). Indeed, regardless of the trait or the  
393 statistical model, accuracy for the index was lower than for the slope: 0.31 against versus 0.64  
394 on average (**Erreur ! Source du renvoi introuvable.**). Interestingly, NI, which presented the  
395 highest G×E, was the trait with the lowest accuracy for the index (0.17 and 0.21). However,  
396 index predictions were less accurate for FL, the trait with the lowest G×E, (0.29 and 0.30) than  
397 for PW (0.43 and 0.48) with intermediate G×E. In agreement with the medium to high  
398 correlations at phenotypic level, the prediction accuracies for the slope and the variables under  
399 each condition were comparable. However, different trends were observed depending on the

400 trait. For FL and PW, accuracies for the slope were closer to accuracies under AWD than under  
401 CF. For NI, the opposite was observed. In all cases, slope prediction was as accurate as the best  
402 single-environment prediction. The level of accuracy depended secondly on the trait (Table 2).  
403 On average, accuracy was higher for FL (0.6) than for PW (0.58) and NI (0.45). The statistical  
404 models differed significantly from each other although the effect was small. RKHS performed  
405 better than GBLUP in almost all cases with differences in accuracy of up to 0.05. The  
406 interactions between factors influencing prediction accuracy were not important, except for the  
407 one between the response variable and the trait (Table 2).

#### 408 Prediction accuracy across populations

409 On average, across generation prediction for both observed and computed response variables  
410 was less accurate (0.28) than prediction within the reference population (Table S5). Accuracies  
411 ranged from -0.01 to 0.38, with an average of 0.25 for FL, from -0.1 to 0.45, with an average  
412 of 0.22, for NI, and from 0.14 to 0.56, with an average of 0.38 for PW, depending on the type  
413 of variables (observed variables, index and slope), the scenario and the model (Figure 4).  
414 Among these factors, the most influential was again the type of response (Table S5), with the  
415 lowest average accuracy of 0.12 for index and the highest average accuracy of 0.35 for slope.  
416 The prediction accuracy under the single environment AWD and CF averaged 0.34 and 0.32,  
417 respectively. The effect of the scenario came in second, with an average accuracy of 0.27 for  
418 S1, 0.22 for S2, and 0.35 for S3. The statistical models GBLUP and RKHS performed similarly  
419 on average (accuracy of 0.28) but the range of variation was slightly wider in RKHS (-0.1 to  
420 0.56) than in GBLUP (-0.01 to 0.51).

## 421 Accuracy of genomic prediction using multi-environment models

### 422 Prediction accuracy in the reference population

423 The focus here was on multi-environment models and the two different cross-validation  
424 methods (M1 and M2), using single environment models as the baseline. Average accuracies  
425 ranged from 0.47 to 0.96, depending on (in decreasing importance): the trait, the type of model  
426 (i.e. single versus multi-environment), the cross-validation strategy, the statistical model and  
427 the water management system (Figure 5, Table S6). The average accuracy was of 0.79, 0.56  
428 and 0.69 for FL, NI and PW respectively. Whatever the trait or the water management system,  
429 multi-environment models with the M1 strategy performed similarly to the single environment  
430 model with a decrease of up to 0.02 for GBLUP and up to 0.03 for RKHS-1 and RKHS-2. As  
431 expected, the multi-environment models with the M2 strategy outperformed single environment  
432 models with an average gain of 0.23 and 0.27 for FL, 0.14 and 0.10 for NI and 0.20 and 0.20  
433 for PW in AWD and CF, respectively. These gains in accuracy were in agreement with the level  
434 of G×E found for each trait. Among the significant interactions between factors, the trait × cross  
435 validation strategy interaction was the most important and corresponded to a scale interaction  
436 (Table 3). Among the multi-environment prediction models, RKHS-1 and RKHS-2 performed  
437 similarly, with average accuracy of 0.72 and 0.71, respectively, and performed systematically  
438 slightly better than GBLUP, with a gain in accuracy of up to 0.04.

### 439 Prediction accuracy across populations

440 The overall mean accuracy was 0.33, with values ranging from -0.03 up to 0.58 (Figure 6,  
441 Table S7), mainly depending on traits and scenarios for the composition of the training set. The  
442 average accuracy was of 0.30, 0.27, and 0.44 for FL, NI and PW, respectively. The average  
443 accuracy of the three scenarios was 0.32, 0.28 and 0.40 for S1, S2 and S3, respectively. The  
444 range of variation in accuracy for the remaining factors (single versus multiple environment,

445 target environment and prediction model) did not exceed 0.03. These latter factors influenced  
446 the accuracy mainly in interactive mode.

447

## 448 Discussion

### 449 Impact of AWD water management system on rice performance

450 The AWD water management implemented in this study (a new cycle of irrigation was  
451 triggered when soil water potential reached -30 kPa) resulted in medium intensity stress for FL  
452 and NI traits, rather severe stress intensity for PW when evaluated in terms of relative  
453 performance. The effects of AWD we observed on PW (-27% on average), are similar to those  
454 reported by Carrijo *et al.* (2017) on yield, in their review of 56 studies with 528 side-by-side  
455 comparisons of yield under AWD and CF. These authors reported an average decrease in yields  
456 of 5.4%, almost no yield losses under mild AWD (i.e. when soil water potential was kept  $\geq -20$   
457 kPa), and yield losses of 22.6% relative to CF under severe AWD, when the soil water potential  
458 went beyond  $-20$  kPa. However, in contrast with our experiment, which pioneered the analysis  
459 of genotypic responses to AWD within a diversity panel representing a large share of diversity  
460 of one of the sub-species of rice (*O. sativa, japonica*), the majority of the studies included in  
461 Carrijo *et al.*'s (2017) meta-analysis used only a small number of rice varieties and the crop was  
462 established by transplanting. Among the few studies reporting on traits other than grain yield,  
463 Sudhir *et al.* (2011) reported crop maturity delay of 5-10% under severe AWD, similar to our  
464 results (9% on average).

### 465 Genomic prediction of response to AWD

466 The two computed variables (response index and slope of the joint regression) were intended  
467 to provide a measurement of G×E for each accession of RP and PP, which could be used as the

468 entry phenotype for genomic prediction. The index, which evaluates tolerance to AWD water  
469 management, was very closely correlated with the stress sensitivity and tolerance index  
470 proposed by Fischer and Maurer (1978) and (Rosielle and Hamblin 1981), respectively (data  
471 not shown). The slope provides a measurement of stability of breeding material along  
472 environmental gradients in multi-environment trials (Eberhart and Russell 1966; Lin et al.  
473 1986). However, the fact that the environmental index is not independent of the performances  
474 of the studied genotypes can introduce a bias in the estimate of the regression parameters  
475 (Cossa 1990). Moreover, the percentage of G×E variance explained is often very low, below  
476 25% (for a review, see Brancourt-Hulmel et al. 1997). In our case, the number of environments  
477 considered, two, was probably too few for a precise estimate of the regression slope for each  
478 genotype. On the other hand, the large number of genotypes involved in the estimate of the  
479 environmental index (284 for RP and 97 for PP) limited the above-mentioned risk of bias. Given  
480 the very high correlations between the computed slopes and the measured phenotypes for the  
481 three traits under AWD and CF in both RP and PP populations ( $r > 0.9$ , except for PW under  
482 AWD in PP ( $r = 0.73$ )), it represents a reasonably good single entry phenotype to consider for  
483 breeding both for adaptation to AWD and performance under CF.

484 The accuracy of genomic prediction for the response index was significantly lower than for  
485 the slope and for the corresponding measured traits under AWD and CF, suggesting limited  
486 genetic control of variation for the response index. Similar results were reported by (Huang et  
487 al. 2016) for trait stability in wheat. Nevertheless, given the loose correlations between the  
488 response index and the measured traits, genomic prediction for the index and the measured trait  
489 in CF could be used to select for good performance in both systems.

## 490 Genomic prediction using multi-environment data

491 The potential of GS to accelerate the pace of genetic gains in major field crops has been  
492 documented by a large number of studies using a simulation approach or experimental data  
493 (Cossa *et al.* 2017; Hickey *et al.* 2017). In the case of rice, several empirical studies,  
494 summarized in Ben Hassen *et al.* (2017), confirmed this potential. However, the focus of most  
495 previous crop genomic prediction studies was on within-environment prediction, based on  
496 single environment models. It was recently demonstrated that the accuracy of genomic  
497 prediction models that account for G×E is significantly greater than that attained by single  
498 environment models (Cuevas *et al.* 2016; Cuevas *et al.* 2017; Burgueño *et al.* 2012; Jarquín *et*  
499 *al.* 2014; Lopez-Cruz *et al.* 2015; Heslot *et al.* 2014). The empirical component of almost all of  
500 these studies was based on data from unmanaged multi-environment trials of genotypes across  
501 several locations (and often several years), mainly conducted to study G×E and the general  
502 stability of the genotype across environments. The multi-environment genomic prediction  
503 results we present here stand out among the aforementioned ones because we used data from  
504 managed bi-environment trials undertaken to study G×E and genotype adaptation to a specific  
505 abiotic constraint, i.e. AWD water management.

506 The level of prediction accuracy obtained in our cross validation experiments in the reference  
507 population under the M1 prediction strategy with the multi-environment GBLUP, RKHS-1 and  
508 RKHS-2 models, calibrated with data from both AWD and CF water management, was similar  
509 to that obtained with their single environment counterparts, calibrated with data from either  
510 AWD or CF. These results confirm the power of multi-environment genomic models to predict  
511 the performances of untested genotypes using data from multiple trials. Under the M2  
512 prediction strategy, the three multi-environment models provided significantly higher  
513 prediction accuracy for genotypes that had not been tested in one of the two water management  
514 systems than their single-environment counterparts, further confirming the advantages of multi-

515 environment prediction models. In order to challenge the performance of the multi-environment  
516 models further, we ran the M1 and M2 strategies with a larger number of untested entrees (40%  
517 instead of 20%) in both AWD and CF for M1, in AWD or CF for M2. The results in Figure S2  
518 show a very small reduction in prediction accuracy. The average prediction accuracy for the  
519 three traits, the two water managements and the three prediction models was 0.59 instead of  
520 0.61 for M1, and 0.79 instead of 0.81 for M2. These results suggest the possibility of optimizing  
521 the method of evaluation of the lines by targeting a specific set of lines for each condition  
522 (Rincent *et al.* 2017).

523 Lopez-Cruz *et al.* (2015) reported gains in prediction accuracy of up to 30% with the  
524 GBLUP-type multi-environment model compared to an across-environment analysis that  
525 ignores  $G \times E$ , when applied to the wheat grain yield of three sets of advanced lines recorded in  
526 three different years under three irrigation regimes. In our case, significant gains in accuracy  
527 were observed only with the M2 strategy, and ranged from 17% for NI to 29% for FL. Using  
528 wheat and maize data, Cuevas *et al.* (2016) reported up to 68% higher accuracy for RKHS-1  
529 models compared to single environment models and up to 17% compared to GBLUP- $G \times E$ .  
530 These authors hypothesized that the superiority of the Gaussian kernel models over the linear  
531 kernel was due to more flexible kernels that account for small, more complex marker main  
532 effects and marker specific interaction effects. In our experiments, RKHS-1 was up to 35%  
533 more accurate than single environment GBLUP and up to 10% more accurate than GBLUP-  
534  $G \times E$  model. On the other hand, we did not observe any notable differences in the prediction  
535 accuracy of the RKHS-2 model compared to GBLUP- $G \times E$  and RKHS-1, as already reported  
536 by Cuevas *et al.* (2017). This is probably due to the positive correlation between performances  
537 under AWD and CF water management systems in our experiments, while the most favorable  
538 context for the application the approach developed by Cuevas *et al.* (2017) is said to be when



539 different types of correlation (positive, zero, or negative) between the environments considered,  
540 coexist.

541 The results of our progeny validation experiments did not question the higher prediction  
542 accuracy of multi-environment models compared to single environment ones observed in our  
543 cross validation experiments in the reference population. However, in progeny validation  
544 experiments, the multi-environment models affected prediction accuracy mainly in interaction  
545 with other factors, such as the composition of the training set and the trait considered. These  
546 results also confirmed the important role of relatedness between the training and the validation  
547 set in prediction accuracy. It also confirmed the fact that relatively high accuracy could be  
548 achieved using only a rather small share of the RP, the most closely related to the PP as the  
549 training set, as reported by Ben Hassen *et al.* (2017).

550 Finally yet importantly, in both cross validation and progeny validation experiments, the  
551 multi-environment approach achieved higher prediction accuracy than the genomic prediction  
552 for the response index and the slope of the joint regression. For instance, compared to prediction  
553 for slope, the mean advantage of multi-environment prediction was 8% and 10% with GBLUP-  
554 G×E and RKHS-1 models, respectively. The advantage reached 25% under the M2 strategy of  
555 predicting unobserved phenotypes. In the progeny-validation experiments, the mean advantage  
556 was 20% and reached 30% under the S2 scenario of composition of the training set. To our  
557 knowledge, this finding has not yet been reported in the literature. It opens new perspectives in  
558 breeding for adaptation to AWD and to other abiotic stresses.

### 559 [Practical implications for breeding rice for adaptation to AWD](#)

560 “More rice with less water” is vital for food security and for the sustainability of irrigated  
561 rice cropping systems (Tuong *et al.* 2005). AWD water management is one of the most widely  
562 used water-saving techniques practiced today (Carrijo *et al.* 2017). The development of rice

Ben Hassen *et al.*, Genomic prediction accounting for genotype by environment interaction

563 varieties adapted to AWD, i.e. with as high yields as the best high yielding variety under CF,  
564 would greatly contribute to wider adoption of AWD water management by farmers (Price et al.  
565 2013; Volante et al. 2017). Given the genetic diversity we observed for response to AWD within  
566 the working collection of the CREA, which represents only a share of the genetic diversity of  
567 the rice *japonica* sub-species, one can expect large genetic diversity at the whole species level.

568 The almost identical and high level of broad-sense heritability observed under AWD and CF  
569 water management systems demonstrates the feasibility of direct selection for AWD. Such high  
570 heritability under managed abiotic stress has already been reported in rice for grain yield under  
571 drought stress (Venuprasad et al. 2007; Kumar et al. 2008). However, the adoption of the direct  
572 selection option may not be practicable for breeding programs with limited resources, if they  
573 also need to continue to breed for CF water management. Moreover, this option would not take  
574 full advantage of historical data produced by the breeding program for CF. The high accuracy  
575 of multi-environment genomic prediction we observed in the present study, especially in across-  
576 environment prediction, paves the way for a new breeding option: conducting simultaneously  
577 direct and indirect selection for both AWD and CF. Indeed, as we saw in our M2 strategy, the  
578 multi-environment genomic models can boost the predictive power of across-environment  
579 predictions, i.e. from CF to AWD and *vice versa*. In this context, the practical question would  
580 be the number of selection candidates that need to be phenotyped under the two water  
581 management systems relative to the number of candidates that need to be phenotyped under one  
582 water management system only. Our results suggest that, for the germplasm and environmental  
583 conditions we used and the traits we considered, the percentage of untested candidates under  
584 AWD can go up to 40% with no significant negative effect on prediction accuracy as long as  
585 they are tested under CF, or *vice versa*. Considering the additional cost reductions that could be  
586 obtained by optimizing the size of the training set, as shown by the S1 scenario in our across-  
587 generations prediction experiments, it seems possible to add the objective of adaptation to AWD

Ben Hassen *et al.*, Genomic prediction accounting for genotype by environment interaction

588 to an existing GS based rice breeding program for CF, with rather limited additional costs. Ben  
589 Hassen et al. (2017) showed that rice breeding programs based on pedigree schemes can use a  
590 genomic model trained with data from their working collection to predict performances of  
591 progenies produced by the conventional pedigree breeding program. Breeding for adaptation to  
592 AWD can be integrated in this general scheme. The feasibility of application of this breeding  
593 approach to other abiotic stresses deserves further exploration.

Ben Hassen *et al.*, Genomic prediction accounting for genotype by environment interaction

594

595 **Authors' contributions**

596 NA and GV conceived the study. JB, MBH and TVC analyzed the data. MBH, TVC, JB and

597 NA wrote the manuscript.

598

599

## References

- 600 Ben Hassen, M., T.V. Cao, J. Bartholomé, G. Orasen, C. Colombi *et al.*, 2017 Rice diversity panel  
601 provides accurate genomic predictions for complex traits in the progenies of biparental crosses  
602 involving members of the panel. *Theoretical and Applied Genetics*.
- 603 Boer, M.P., D. Wright, L. Feng, D.W. Podlich, L. Luo *et al.*, 2007 A Mixed-Model Quantitative Trait  
604 Loci (QTL) Analysis for Multiple-Environment Trial Data Using Environmental Covariables  
605 for QTL-by-Environment Interactions, With an Example in Maize. *Genetics* 177 (3):1801-1813.
- 606 Brancourt-Hulmel, M., V. Biarnès-Dumoulin, and J. Denis, 1997 Points de repère dans l'analyse de la  
607 stabilité et de l'interaction génotype-milieu en amélioration des plantes. *Agronomie* 17 (4):219-  
608 246.
- 609 Bueno, C.S., E. Pasuquin, B. Tubaña, and T. Lafarge, 2010 Improving sink regulation, and searching  
610 for promising traits associated with hybrids, as a key avenue to increase yield potential of the  
611 rice crop in the tropics. *Field Crops Research* 118 (3):199-207.
- 612 Burgueño, J., G. de los Campos, K. Weigel, and J. Crossa, 2012 Genomic Prediction of Breeding Values  
613 when Modeling Genotype  $\times$  Environment Interaction using Pedigree and Dense Molecular  
614 Markers. *Crop Science* 52 (2):707-719.
- 615 Carrijo, D.R., M.E. Lundy, and B.A. Linqvist, 2017 Rice yields and water use under alternate wetting  
616 and drying irrigation: A meta-analysis. *Field Crops Research* 203:173-180.
- 617 CGIAR Research Program on Rice, 2016 Annual Report 2016. International Rice Research Institute  
618 (IRRI), Los Banos, Philippines.
- 619 Cooper, M., I. DeLacy, and R. Eisemann, 1993 Recent advances in the study of genotype $\times$  environment  
620 interactions and their application to plant breeding, pp. 116-131 in *Focused Plant Improvement:  
621 Towards Responsible and Sustainable Agriculture. Australian Plant Breeding Conference Gold  
622 Coast, Queensland*.
- 623 Cooper, M., and I.H. DeLacy, 1994 Relationships among analytical methods used to study genotypic  
624 variation and genotype-by-environment interaction in plant breeding multi-environment  
625 experiments. *Theoretical and Applied Genetics* 88 (5):561-572.
- 626 Cooper, M., and G.L. Hammer, 1996 *Plant adaptation and crop improvement*. Wallingford: CAB  
627 INTERNATIONAL.
- 628 Crossa, J., 1990 Statistical Analyses of Multilocation Trials, pp. 55-85 in *Advances in Agronomy*, edited  
629 by N.C. Brady. Academic Press.
- 630 Crossa, J., G. de los Campos, M. Maccaferri, R. Tuberosa, J. Burgueño *et al.*, 2016 Extending the Marker  
631  $\times$  Environment Interaction Model for Genomic-Enabled Prediction and Genome-Wide  
632 Association Analysis in Durum Wheat. *Crop Science* 56:2193-2209.
- 633 Crossa, J., P. Pérez-Rodríguez, J. Cuevas, O. Montesinos-López, D. Jarquín *et al.*, 2017 Genomic  
634 Selection in Plant Breeding: Methods, Models, and Perspectives. *TRENDS in Plant Science* 22  
635 (11):961-975.
- 636 Cuevas, J., J. Crossa, O.A. Montesinos-López, J. Burgueño, P. Pérez-Rodríguez *et al.*, 2017 Bayesian  
637 Genomic Prediction with Genotype  $\times$  Environment Interaction Kernel Models. *G3:  
638 Genes/Genomes/Genetics* 7 (1):41-53.
- 639 Cuevas, J., J. Crossa, V. Soberanis, S. Pérez-Elizalde, P. Pérez-Rodríguez *et al.*, 2016 Genomic  
640 Prediction of Genotype  $\times$  Environment Interaction Kernel Regression Models. *The Plant  
641 Genome* 9 (3).
- 642 de Leon, N., J.-L. Jannink, J.W. Edwards, and S.M. Kaeppler, 2016 Introduction to a special issue on  
643 genotype by environment interaction. *Crop Science* 56 (5):2081-2089.
- 644 De los Campos, G., and A. Grüneberg, 2018 MTM (Multiple-Trait Model) package.
- 645 Eberhart, S.A., and W.A. Russell, 1966 Stability Parameters for Comparing Varieties. *Crop Science* 6  
646 (1):36-40.
- 647 Elias, A.A., K.R. Robbins, R.W. Doerge, and M.R. Tuinstra, 2016 Half a Century of Studying Genotype  
648  $\times$  Environment Interactions in Plant Breeding Experiments. *Crop Science* 56 (5):2090-2105.

- 649 Elshire, R.J., J.C. Glaubitz, Q. Sun, J.A. Poland, K. Kawamoto *et al.*, 2011 A Robust, Simple  
650 Genotyping-by-Sequencing (GBS) Approach for High Diversity Species. *PLoS ONE* 6  
651 (5):e19379.
- 652 Falconer, D.S., 1989 *Introduction to quantitative genetics*. Burnt Mill, Harlow, Essex, England; New  
653 York: Longman, Scientific & Technical ; Wiley.
- 654 Fischer, K.S., R. Lafitte, S. Fukai, G. Atlin, and B. Hardy, 2003 *Breeding rice for drought-prone*  
655 *environments*. Los Baños (Philippines): International Rice Research Institute.
- 656 Fischer, R., and R. Maurer, 1978 Drought resistance in spring wheat cultivars. I. Grain yield responses.  
657 *Australian Journal of Agricultural Research* 29 (5):897-912.
- 658 Freeman, G.H., 1973 Statistical methods for the analysis of genotype-environment interactions.  
659 *Heredity* 31 (3):339-354.
- 660 Gelman, A., and D.B. Rubin, 1992 Inference from iterative simulation using multiple sequences.  
661 *Statistical science*:457-472.
- 662 Glaubitz, J.C., T.M. Casstevens, F. Lu, J. Harriman, R.J. Elshire *et al.*, 2014 TASSEL-GBS: A High  
663 Capacity Genotyping by Sequencing Analysis Pipeline. *PLoS ONE* 9 (2):e90346.
- 664 Heslot, N., D. Akdemir, M.E. Sorrells, and J.-L. Jannink, 2014 Integrating environmental covariates and  
665 crop modeling into the genomic selection framework to predict genotype by environment  
666 interactions. *Theoretical and Applied Genetics* 127 (2):463-480.
- 667 Hickey, J.M., T. Chiurugwi, I. Mackay, W. Powell, and C.B.P.W.P. Implementing Genomic Selection  
668 in, 2017 Genomic prediction unifies animal and plant breeding programs to form platforms for  
669 biological discovery. *Nat Genet* 49 (9):1297-1303.
- 670 Holland, J., W. Nyquist, and C. Cervantes-Martinez, 2003 Estimating and interpreting heritability for  
671 plant breeding: an update. 22:9-111.
- 672 Huang, M., A. Cabrera, A. Hoffstetter, C. Griffey, D. Van Sanford *et al.*, 2016 Genomic selection for  
673 wheat traits and trait stability. *Theoretical and Applied Genetics* 129 (9):1697-1710.
- 674 Jarquín, D., J. Crossa, X. Lacaze, P. Du Cheyron, J. Daucourt *et al.*, 2014 A reaction norm model for  
675 genomic selection using high-dimensional genomic and environmental data. *TAG. Theoretical*  
676 *and Applied Genetics. Theoretische Und Angewandte Genetik* 127 (3):595-607.
- 677 Kumar, A., J. Bernier, S. Verulkar, H.R. Lafitte, and G.N. Atlin, 2008 Breeding for drought tolerance:  
678 direct selection for yield, response to selection and use of drought-tolerant donors in upland and  
679 lowland-adapted populations. *Field Crops Res* 107.
- 680 Lampayan, R.M., R.M. Rejesus, G.R. Singleton, and B.A.M. Bouman, 2015 Adoption and economics  
681 of alternate wetting and drying water management for irrigated lowland rice. *Field Crops*  
682 *Research* 170:95-108.
- 683 Lin, C.S., M.R. Binns, and L.P. Lefkovich, 1986 Stability Analysis: Where Do We Stand? *Crop Science*  
684 26 (5):894-900.
- 685 Linqvist, B.A., M.M. Anders, M.A.A. Adviento-Borbe, R.L. Chaney, L.L. Nalley *et al.*, 2015 Reducing  
686 greenhouse gas emissions, water use, and grain arsenic levels in rice systems. *Global Change*  
687 *Biology* 21 (1):407-417.
- 688 Lopez-Cruz, M., J. Crossa, D. Bonnett, S. Dreisigacker, J. Poland *et al.*, 2015 Increased Prediction  
689 Accuracy in Wheat Breeding Trials Using a Marker  $\times$  Environment Interaction Genomic  
690 Selection Model. *G3: Genes/Genomes/Genetics* 5 (4):569-582.
- 691 Malosetti, M., J.-M. Ribaut, and F.A. van Eeuwijk, 2013 The statistical analysis of multi-environment  
692 data: modeling genotype-by-environment interaction and its genetic basis. *Frontiers in*  
693 *Physiology* 4.
- 694 Malosetti, M., J. Voltas, I. Romagosa, S.E. Ullrich, and F.A.V. Eeuwijk, 2004 Mixed models including  
695 environmental covariables for studying QTL by environment interaction. *Euphytica* 137:139-  
696 145.
- 697 Mekonnen, M.M., and A.Y. Hoekstra, 2016 Four billion people facing severe water scarcity. *Science*  
698 *Advances* 2.
- 699 Nakagawa, S., and H. Schielzeth, 2013 A general and simple method for obtaining  $R^2$  from generalized  
700 linear mixed-effects models. *Methods in Ecology and Evolution* 4 (2):133-142.
- 701 Pérez-Elizalde, S., J. Cuevas, P. Pérez-Rodríguez, and J. Crossa, 2015 Selection of the Bandwidth  
702 Parameter in a Bayesian Kernel Regression Model for Genomic-Enabled Prediction. *Journal of*  
703 *Agricultural, Biological, and Environmental Statistics* 20 (4):512-532.

- 704 Pérez, P., and G. de los Campos, 2014 Genome-Wide Regression and Prediction with the BGLR  
705 Statistical Package. *Genetics* 198 (2):483-495.
- 706 Plummer, M., N. Best, K. Cowles, and K. Vines, 2006 CODA: convergence diagnosis and output  
707 analysis for MCMC. *R News* 6:7-11.
- 708 Price, A.H., G.J. Norton, D.E. Salt, O. Ebenhoeh, A.A. Meharg *et al.*, 2013 Alternate wetting and drying  
709 irrigation for rice in Bangladesh: Is it sustainable and has plant breeding something to offer?  
710 *Food and Energy Security* 2 (2):120-129.
- 711 R Core Team, 2017 R: A Language and Environment for Statistical Computing. URL [http://www.R-](http://www.R-project.org/)  
712 [project.org/](http://www.R-project.org/), R Foundation for Statistical Computing, Vienna, Austria.
- 713 Rijsberman, F.R., 2006 Water scarcity: Fact or fiction? *Special Issue on Water Scarcity: Challenges and*  
714 *Opportunities for Crop Science* 80:5-22.
- 715 Rincent, R., E. Kuhn, H. Monod, F.-X. Oury, M. Rousset *et al.*, 2017 Optimization of multi-environment  
716 trials for genomic selection based on crop models. *Theoretical and Applied Genetics*.
- 717 Rincent, R., D. Laloë, S. Nicolas, T. Altmann, D. Brunel *et al.*, 2012 Maximizing the Reliability of  
718 Genomic Selection by Optimizing the Calibration Set of Reference Individuals: Comparison of  
719 Methods in Two Diverse Groups of Maize Inbreds (*Zea mays* L.). *Genetics* 192 (2):715-728.
- 720 Rosielle, A.A., and J. Hamblin, 1981 Theoretical Aspects of Selection for Yield in Stress and Non-Stress  
721 Environment. *Crop Science* 21 (6):943-946.
- 722 Sandhu, N., S.R. Subedi, R.B. Yadaw, B. Chaudhary, H. Prasai *et al.*, 2017 Root Traits Enhancing Rice  
723 Grain Yield under Alternate Wetting and Drying Condition. *Frontiers in Plant Science* 8 (1879).
- 724 Sudhir, Y., G. Gill, E. Humphreys, S.S. Kukal, and U.S. Walia, 2011 Effect of water management on  
725 dry seeded and puddled transplanted rice. Part 1: Crop performance. *Field Crops Research* 120  
726 (1):112-122.
- 727 Tuong, P., B.A.M. Bouman, and M. Mortimer, 2005 More Rice, Less Water—Integrated Approaches  
728 for Increasing Water Productivity in Irrigated Rice-Based Systems in Asia. *Plant Production*  
729 *Science* 8 (3):231-241.
- 730 Tuong, T.P., and B.A.M. Bouman, 2003 Rice Production in Water-scarce Environments, pp. 368 in  
731 *Water Productivity in Agriculture: Limits and Opportunities for Improvements*.
- 732 van Eeuwijk, F.A., M.C.A.M. Bink, K. Chenu, and S.C. Chapman, 2010 Detection and use of QTL for  
733 complex traits in multiple environments. *Current opinion in plant biology* 13 (2):193-205.
- 734 Van Raden, P.M., 2008 Efficient Methods to Compute Genomic Predictions. *Journal of Dairy Science*  
735 91 (11):4414-4423.
- 736 Venuprasad, R., N. Zenna, R.I. Choi, M. Amante, P.S. Virk *et al.*, 2007 *Identification of marker loci*  
737 *associated with tungro and drought tolerance in near-isogenic rice lines derived from*  
738 *IR64/Aday Sel. IRRN 32.1*.
- 739 Volante, A., F. Desiderio, A. Tondelli, R. Perrini, G. Orasen *et al.*, 2017 Genome-Wide Analysis of  
740 japonica Rice Performance under Limited Water and Permanent Flooding Conditions. *Frontiers*  
741 *in Plant Science* 8 (1862).
- 742 Yang, J., K. Liu, Z. Wang, Y. Du, and J. Zhang, 2007 Water-saving and high-yielding irrigation for  
743 lowland rice by controlling limiting values of soil water potential. *Journal of Integrative Plant*  
744 *Biology* 49 (10):1445-1454.
- 745





## 747 Acknowledgments

748 This work was funded by Agropolis Foundation (<http://www.agropolis-fondation.fr/>) and  
749 Cariplo Foundation (<http://www.fondazionecariplo.it/>), Grant no 1201-006.

750

## 751 Conflict of Interest

752 The authors declare that they have no conflict of interest.

753

## 754      **Supplementary figures and tables**

755      **Figure S1:** Correlation matrix between performance in each condition (AWD: alternate wetting  
756      and drying and CF: continuous flooding) and response variables (response index and slope of  
757      the joint regression) for the three traits considered: days to flowering (FL), nitrogen-balance  
758      index (NI), and panicle weight (PW). The reference (RP) and progeny (PP) populations are in  
759      green and grey, respectively.

760      **Figure S2:** Single environment and multi-environment (M1 and M2) prediction accuracies in  
761      cross validation experiments with 40% of untested entries in the reference population obtained  
762      with three statistical models (GBLUP, RKHS-1, RKHS-2). Continuous flooding and alternate  
763      wetting and drying water management conditions are in blue and orange, respectively. Three  
764      traits are presented: days to flowering (FL), nitrogen balance index (NI) panicle weight (PW).  
765      The letters in each panel represent the results of Tukey's HSD comparison of means and apply  
766      to each panel independently. The means differ significantly ( $p$ -value < 0.05) if two boxplots  
767      have no letter in common.

768

769      **Table S1:** Variance components and the associated statistic (F-value for fixed effects and Z-  
770      value for random effects) of days to flowering (FL), nitrogen balance index (NI), and panicle  
771      weight (PW). Separate analysis of each population and each water management system  
772      (alternate wetting and drying – AWD and continuous flooding – CF).

773      **Table S2:** Variance components and the associated statistic: F-value for fixed effects and Z-  
774      value for random effects) of days to flowering (FL), nitrogen balance index (NI), and panicle  
775      weight (PW). Separate analysis of each population pooled over water management conditions.

776      **Table S3:** Variance components for the joint regression for days to flowering (FL), nitrogen  
777      balance index (NI), and panicle weight (PW). Results are shown for the reference and progeny  
778      populations.

779      **Table S4:** Mean genomic prediction accuracies in the reference population for the response  
780      variables (index and slope) and the performance within each condition (AWD and CF). The  
781      results for days to flowering (FL), nitrogen balance index (NI) and panicle weight (PW) are  
782      presented. Two statistical models (GBLUP and RKHS) were used.

783      **Table S5:** Genomic prediction accuracies for across population validation for the response  
784      variables (index and slope) and the performance within each condition (AWD and CF). The  
785      scenarios used to define the training set are S1 (only the parents), S2 (100 individuals of the RP  
786      selected with CDmean) and S3 (the whole RP). Results for days to flowering (FL), nitrogen  
787      balance index (NI) and panicles weight (PW) are presented. Two statistical models (GBLUP  
788      and RKHS) were used.

789 **Table S6:** Mean genomic prediction accuracy of the performance within each condition (AWD  
790 and CF) using single or multi-environment models in the reference population. For multi-  
791 environment models, two methods of cross-validation were used: M1 and M2. Results for days  
792 to flowering (FL), nitrogen balance index (NI) and panicle weight (PW) are presented. Two  
793 statistical models (GBLUP, RKHS) were used in single environment prediction and three  
794 (GBLUP, RKHS-1 and RKHS-2) in multi-environment prediction.

795 **Table S7:** Genomic prediction accuracies of the performance within each condition (AWD and  
796 CF) using single or multi-environment models for across population validation. The scenarios  
797 used to define the training set are S1 (only the parents), S2 (100 individuals of the RP selected  
798 with CDmean) and S3 (the whole RP). Results for days to flowering (FL), nitrogen balance  
799 index (NI) and panicle weight (PW) are presented. Two statistical models (GBLUP, RKHS)  
800 were used in single environment prediction and three (GBLUP, RKHS-1 and RKHS-2) in multi-  
801 environment prediction.

802

## Figures and Tables

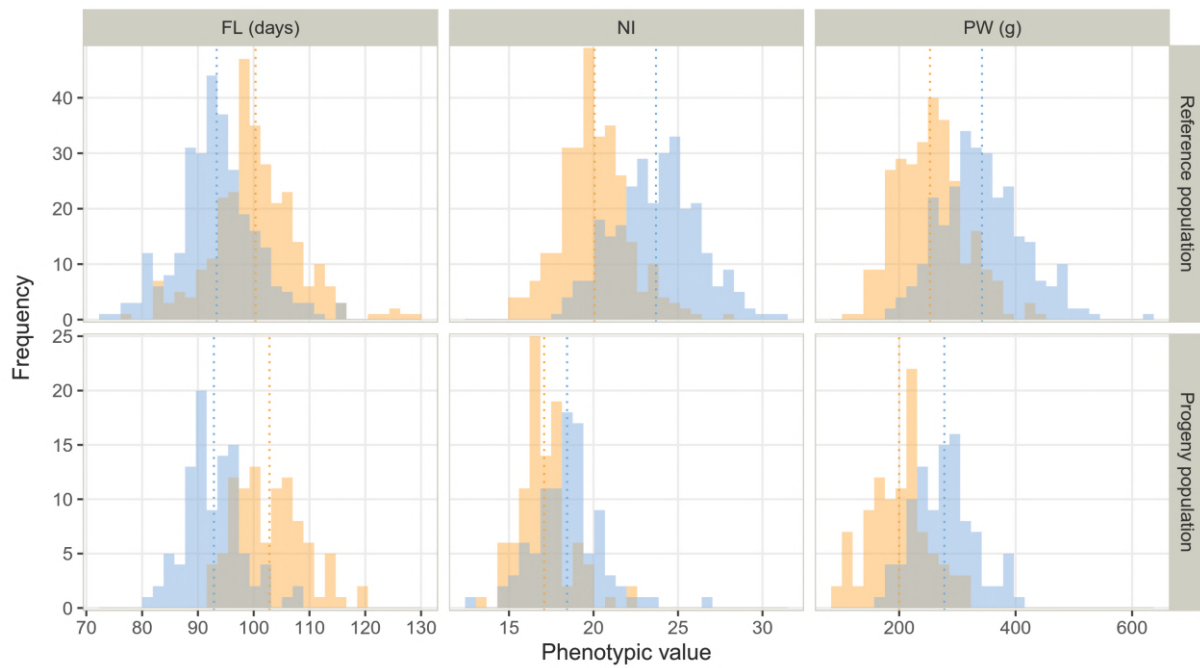

803

804 **Figure 1:** Distribution of adjusted phenotypic values of days to flowering (FL), nitrogen  
805 balance index (NI) and panicle weight (PW) within the reference and progeny populations in  
806 continuous flooding (blue) and alternate wetting and drying (orange) conditions.

807

Ben Hassen *et al.*, Genomic prediction accounting for genotype by environment interaction

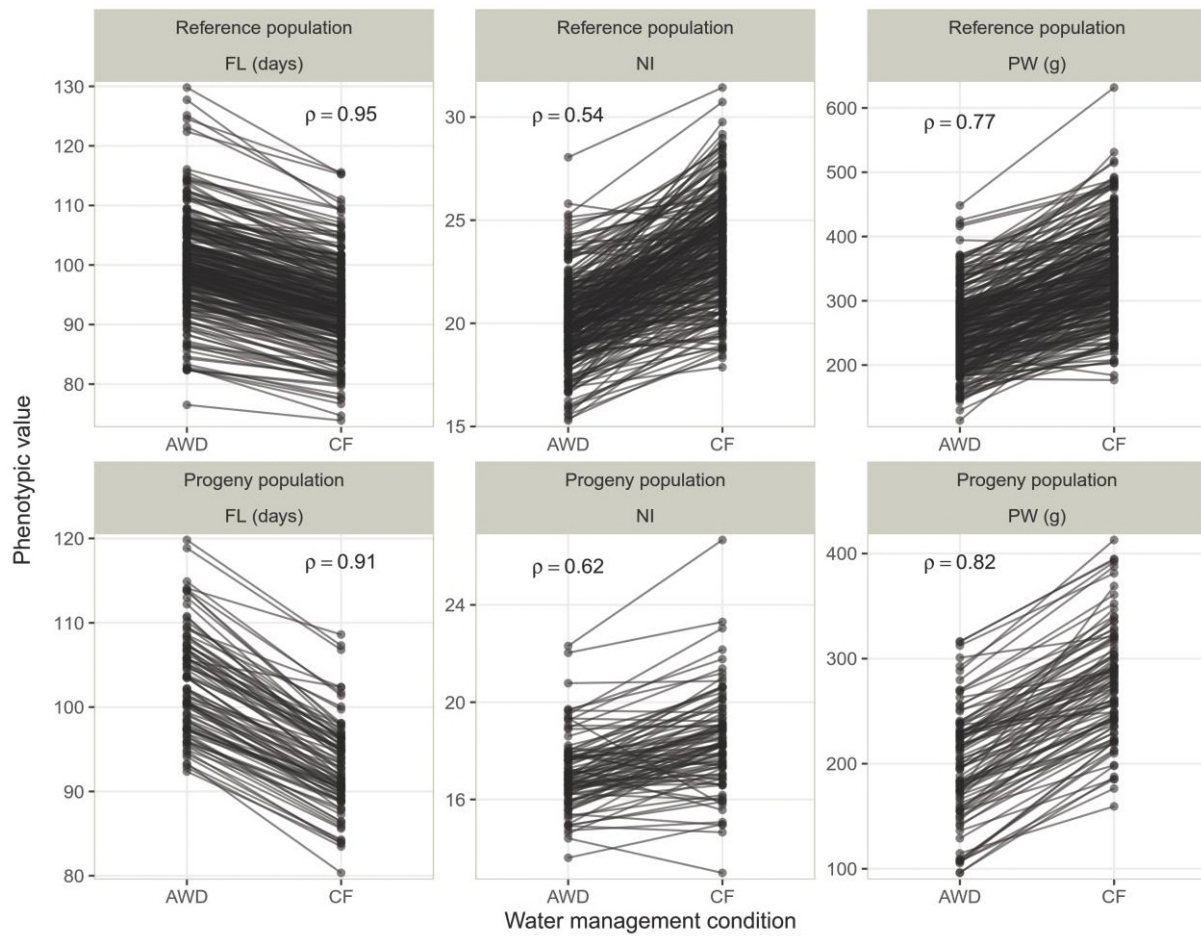

808

809 **Figure 2:** Reaction norm between the two conditions (AWD: alternate wetting and drying and  
810 CF: continuous flooding) for all the genotypes of the two populations (the reference population  
811 and the progeny population). The three traits are represented: days to flowering (FL), nitrogen  
812 balance index (NI) and panicle weight (PW). Spearman's rank correlation coefficient ( $\rho$ ) is  
813 indicated in each panel.

814

815

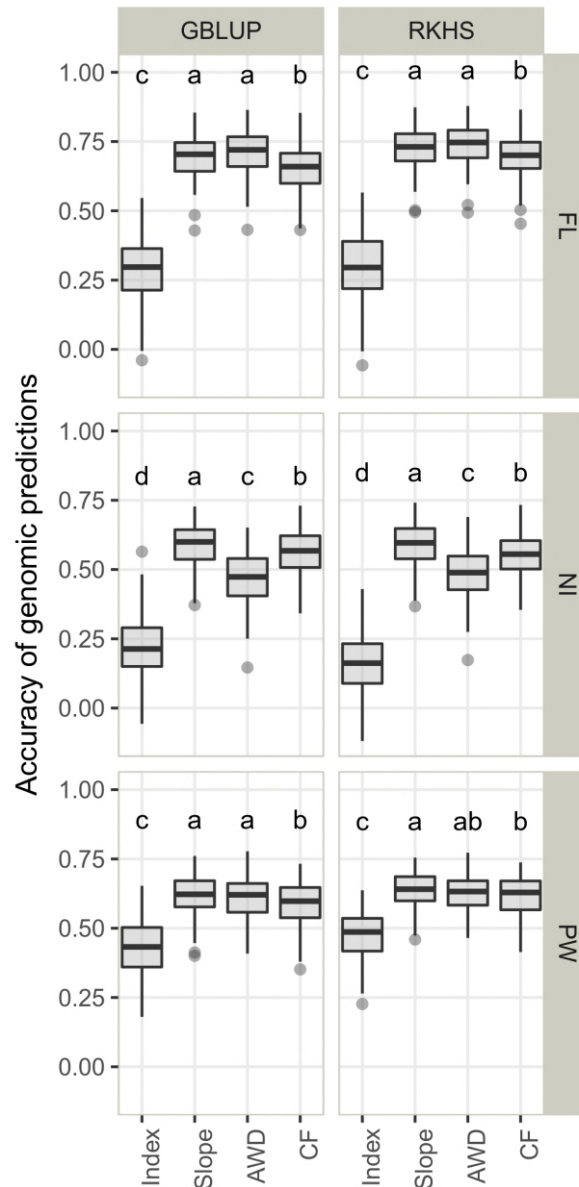

816

817 **Figure 3:** Accuracy of genomic prediction in cross validation experiments within the reference  
818 population obtained with two statistical models (GBLUP, RKHS) for the response variables  
819 (index and slope) and the performance within each condition (AWD and CF). The three traits  
820 are presented: days to flowering (FL), nitrogen balance index (NI) and panicle weight (PW).  
821 The letters in each panel represent the results of Tukey's HSD comparison of means and apply  
822 to each panel independently. The means differ significantly ( $p$ -value  $< 0.05$ ) if two boxplots  
823 have no letter in common.

824

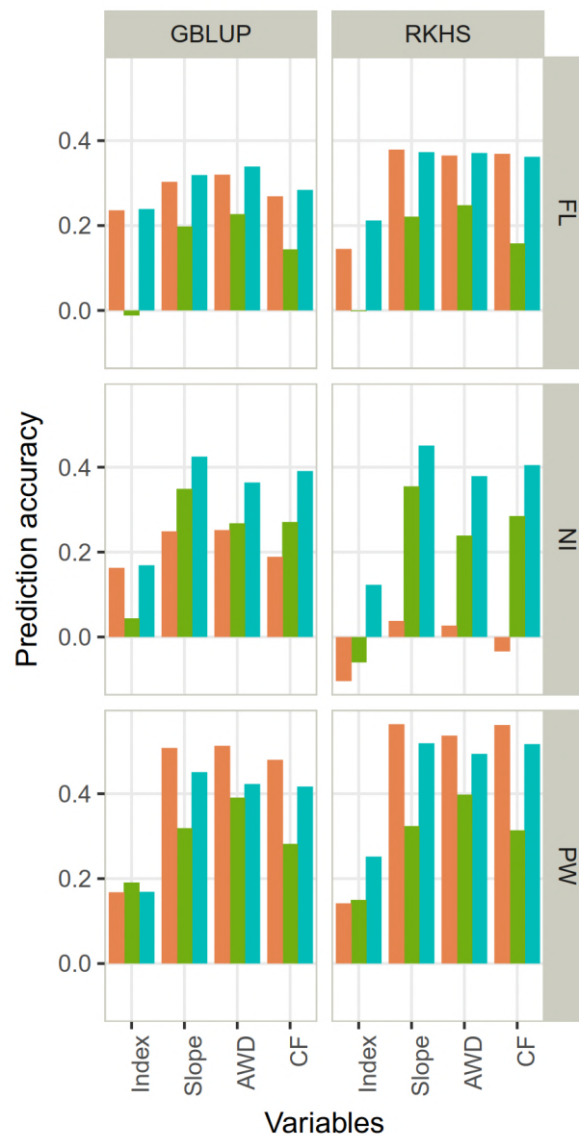

825

826 **Figure 4:** Accuracy of genomic prediction in across population validation for the response  
827 variables (index and slope) and the performance within each condition (AWD and CF) obtained.  
828 Two statistical models (GBLUP, RKHS) and three traits (days to flowering (FL), nitrogen  
829 balance index (NI) and 100 panicle weight (PW)) were studied. The scenarios used to define  
830 the training set are in color: orange (S1: only the parents), green (S2: 100 individuals of the RP  
831 selected with CDmean) and blue (S3: the whole RP).

832

833

834

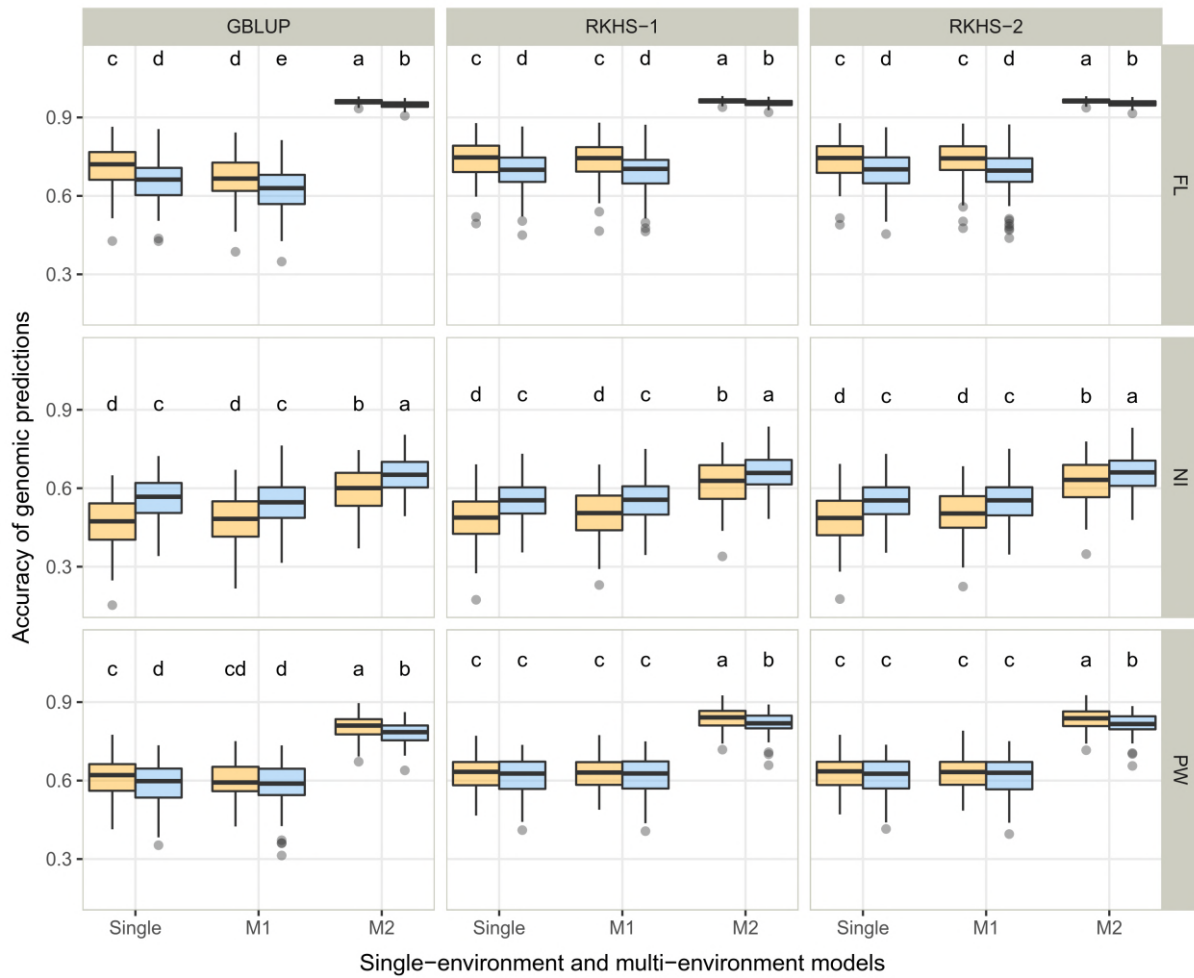

835

836 **Figure 5:** Single environment and multi-environment (M1 and M2) prediction accuracy in cross  
 837 validation experiments in the reference population obtained with three statistical models  
 838 (GBLUP, RKHS-1, RKHS-2). Continuous flooding and alternate wetting and drying water  
 839 management conditions are in blue and orange, respectively. The three studied traits are  
 840 presented: days to flowering (FL), nitrogen balance index (NI) and panicle weight (PW). The  
 841 letters in each panel represent the results of Tukey's HSD comparison of means and apply to  
 842 each panel independently. The means differ significantly ( $p$ -value < 0.05) if two boxplots have  
 843 no letter in common.

844



Ben Hassen *et al.*, Genomic prediction accounting for genotype by environment interaction

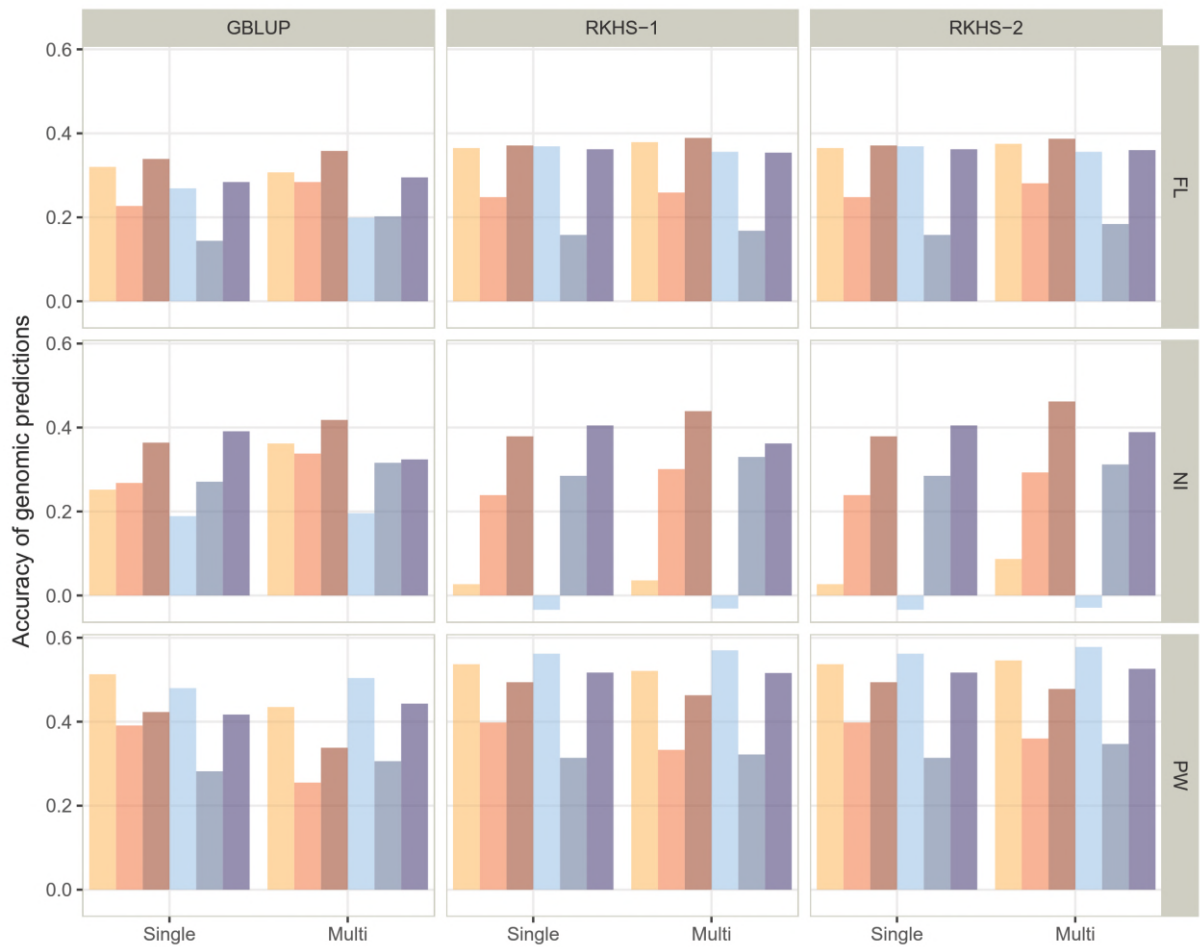

845

846 **Figure 6:** Single environment and multi-environment prediction accuracy in across population  
847 validation experiments obtained with three statistical models (GBLUP, RKHS-1, RKHS-2).  
848 Continuous flooding and alternate wetting and drying water management conditions are in blue  
849 and orange, respectively. The scenarios used to define the training set are represented by the  
850 different shades of orange or blue: light (S1: only the parents), intermediate (S2: 100 individuals  
851 of the RP selected with CDmean) and dark (S3: the whole RP). The three studied traits are  
852 presented: days to flowering (FL), nitrogen balance index (NI) and panicle weight (PW).

853

854 **Table 1:** Sources of phenotypic variation and derived summary statistics of days to flowering  
 855 (FL), nitrogen balance index (NI) and panicle weight (PW) in two populations of rice (reference  
 856 RP and progeny PP) conducted in two consecutive seasons under two water management  
 857 systems (AWD and CF).

| Pop | Trait | System | Mean  | SD   | $\Sigma_{Fixe}^2$<br>(1) | Variances accounted by<br>the random effects <sup>(2)</sup> |        |         | Total<br>phenotypic<br>variance | $R_{Cond}^2$ <sup>(3)</sup> | $H^2(SE)$ <sup>(4)</sup> | $\hat{r}_G[\hat{r}_1; \hat{r}_2]$ <sup>(5)</sup> | $\frac{CR}{DR}$ <sup>(6)</sup> |
|-----|-------|--------|-------|------|--------------------------|-------------------------------------------------------------|--------|---------|---------------------------------|-----------------------------|--------------------------|--------------------------------------------------|--------------------------------|
|     |       |        |       |      |                          | G                                                           | Y x G  | R       |                                 |                             |                          |                                                  |                                |
| RP  | FL    | AWD    | 100.3 | 7.8  | 44.12                    | 57.68                                                       | 10.90  | 11.28   | 123.98                          | 0.91                        | 0.89 (0.01)              | 0.955 [0.943;0.964]                              | 0.98                           |
|     |       | CF     | 93.4  | 7.0  | 8.43                     | 47.78                                                       | 4.36   | 5.95    | 66.52                           | 0.91                        | 0.94 (0.01)              |                                                  |                                |
|     | NI    | AWD    | 20.1  | 2.0  | 0.91                     | 4.99                                                        | 1.22   | 14.71   | 21.83                           | 0.33                        | 0.61 (0.05)              | 0.589 [0.508;0.661]                              | 0.56                           |
|     |       | CF     | 23.7  | 2.5  | 1.50                     | 6.17                                                        | 4.09   | 16.75   | 28.50                           | 0.41                        | 0.56 (0.05)              |                                                  |                                |
|     | PW    | AWD    | 252.9 | 57.9 | 720.96                   | 3435.39                                                     | 949.48 | 3142.66 | 8248.49                         | 0.62                        | 0.76 (0.03)              | 0.773 [0.722;0.816]                              | 0.82                           |
|     |       | CF     | 342.3 | 71.1 | 119.98                   | 5088.95                                                     | 850.38 | 2437.24 | 8496.55                         | 0.71                        | 0.85 (0.02)              |                                                  |                                |
| PP  | FL    | AWD    | 102.8 | 6.1  | 40.94                    | 35.15                                                       | 8.17   | 11.78   | 96.04                           | 0.88                        | 0.85 (0.03)              | 0.897 [0.850;0.930]                              | 0.90                           |
|     |       | CF     | 92.9  | 5.2  | 27.97                    | 23.20                                                       | 7.38   | 2.27    | 60.81                           | 0.96                        | 0.85 (0.03)              |                                                  |                                |
|     | NI    | AWD    | 17.1  | 1.5  | 1.55                     | 3.03                                                        | 0.00   | 5.32    | 9.90                            | 0.46                        | 0.76 (0.04)              | 0.731 [0.622;0.812]                              | 0.75                           |
|     |       | CF     | 18.4  | 2.0  | 2.63                     | 4.12                                                        | 0.70   | 3.72    | 11.16                           | 0.67                        | 0.80 (0.04)              |                                                  |                                |
|     | PW    | AWD    | 199.9 | 51.3 | 889.23                   | 2487.80                                                     | 466.32 | 522.24  | 4365.59                         | 0.88                        | 0.88 (0.02)              | 0.848 [0.781;0.896]                              | 0.86                           |
|     |       | CF     | 277.6 | 53.0 | 258.26                   | 2698.52                                                     | 415.49 | 554.00  | 3926.27                         | 0.86                        | 0.90 (0.02)              |                                                  |                                |

858 <sup>(1)</sup> Variance accounted for by the season effect: Season effect: 2012 *versus* 2013 for the reference population and  
 859 2014 *versus* 2015 for the progeny population.

860 <sup>(2)</sup> Random effects: G: accession, Y x G: Season x Accession, R: Residual

861 <sup>(3)</sup>  $R_{Cond}^2$  : Conditional coefficient of determination

862 <sup>(4)</sup>  $H^2(SE)$  : Broad sense heritability for single environment analysis

863 <sup>(5)</sup> Pearson correlations between adjusted means of accessions under AWD and CF.

864 <sup>(6)</sup> Ratio of correlated response in CF to direct response in AWD.

865

866 **Table 2:** Analysis of factors that influence the prediction accuracy of response variables in the  
 867 reference population. The effects of the type of response (index, slope, AWD, CF), the trait  
 868 (FL, NI and PW), the statistical model (GBLUP and RKHS) and their interactions were  
 869 evaluated.

| R <sup>2</sup>                         | CV     | RMSE  | Mean  | Source                 | DF   | SS      | MS     | FValue  | ProbF   |
|----------------------------------------|--------|-------|-------|------------------------|------|---------|--------|---------|---------|
| Model 1: Only main effects             |        |       |       |                        |      |         |        |         |         |
| 0.648                                  | 23.617 | 0.152 | 0.642 | Model                  | 6    | 101.489 | 16.915 | 734.86  | <0.0001 |
|                                        |        |       |       | Error                  | 2393 | 55.082  | 0.023  |         |         |
|                                        |        |       |       | Corrected Total        | 2399 | 156.570 |        |         |         |
|                                        |        |       |       | Response               | 3    | 77.532  | 25.844 | 1122.78 | <0.0001 |
|                                        |        |       |       | Trait                  | 2    | 23.571  | 11.785 | 512.01  | <0.0001 |
|                                        |        |       |       | S model                | 1    | 0.386   | 0.386  | 16.76   | <0.0001 |
| Model 2: Main effects and interactions |        |       |       |                        |      |         |        |         |         |
| 0.732                                  | 20.681 | 0.133 | 0.642 | Model                  | 23   | 114.633 | 4.984  | 282.38  | <0.0001 |
|                                        |        |       |       | Error                  | 2376 | 41.937  | 0.018  |         |         |
|                                        |        |       |       | Corrected Total        | 2399 | 156.570 |        |         |         |
|                                        |        |       |       | Response               | 3    | 77.532  | 25.844 | 1464.21 | <0.0001 |
|                                        |        |       |       | Trait                  | 2    | 23.571  | 11.785 | 667.71  | <0.0001 |
|                                        |        |       |       | S model                | 1    | 0.386   | 0.386  | 21.86   | <0.0001 |
|                                        |        |       |       | Response*Trait         | 6    | 12.456  | 2.076  | 117.61  | <0.0001 |
|                                        |        |       |       | Trait*S model          | 2    | 0.433   | 0.217  | 12.27   | <0.0001 |
|                                        |        |       |       | Response*S model       | 3    | 0.073   | 0.024  | 1.38    | 0.2459  |
|                                        |        |       |       | Response*Trait*S model | 6    | 0.182   | 0.030  | 1.72    | 0.1126  |

870 R<sup>2</sup>: Coefficient of determination; CV: Coefficient of variation; RMSE: Root mean square error; Mean: Intercept  
 871 value of the transformed accuracy (Z); DF: Degree of freedom; SS: Sum of squares; MS: Mean square.

872

873

874 **Table 3:** Analysis of factors that influence the variation in prediction accuracy in the reference  
 875 population using multi-environment models. The effects of the statistical model (GBLUP,  
 876 RKHS-1 and RKHS-2), the trait (FL, NI and PW), the cross-validation strategy (M1 and M2)  
 877 and the target condition (AWD and CF) and their interactions were evaluated.

| R <sup>2</sup>                                              | CV     | RMSE  | Mean  | Source                       | DF   | SS      | MS      | FValue  | ProbF   |
|-------------------------------------------------------------|--------|-------|-------|------------------------------|------|---------|---------|---------|---------|
| Analysis with only main effects                             |        |       |       |                              |      |         |         |         |         |
| 0.723                                                       | 24.163 | 0.221 | 0.914 | Model                        | 7    | 687.496 | 98.214  | 2014.66 | <0.0001 |
|                                                             |        |       |       | Error                        | 5392 | 262.858 | 0.049   |         |         |
|                                                             |        |       |       | Corrected Total              | 5399 | 950.354 |         |         |         |
|                                                             |        |       |       | CV strategy                  | 2    | 362.879 | 181.439 | 3721.86 | <.0001  |
|                                                             |        |       |       | Trait                        | 2    | 320.946 | 160.473 | 3291.78 | <.0001  |
|                                                             |        |       |       | S model                      | 2    | 3.352   | 1.676   | 34.38   | <.0001  |
|                                                             |        |       |       | Target condition             | 1    | 0.319   | 0.319   | 6.55    | 0.0105  |
| Analysis with main effects and all first-order interactions |        |       |       |                              |      |         |         |         |         |
| 0.899                                                       | 14.640 | 0.134 | 0.914 | Model                        | 25   | 854.176 | 34.167  | 1909.11 | <.0001  |
|                                                             |        |       |       | Error                        | 5374 | 96.178  | 0.018   |         |         |
|                                                             |        |       |       | Corrected Total              | 5399 | 950.354 |         |         |         |
|                                                             |        |       |       | CV strategy                  | 2    | 362.879 | 181.440 | 10138.0 | <.0001  |
|                                                             |        |       |       | Trait                        | 2    | 320.946 | 160.473 | 8966.54 | <.0001  |
|                                                             |        |       |       | S model                      | 2    | 3.352   | 1.676   | 93.65   | <.0001  |
|                                                             |        |       |       | Target condition             | 1    | 0.319   | 0.319   | 17.83   | <.0001  |
|                                                             |        |       |       | CV strategy*Trait            | 4    | 157.483 | 39.371  | 2199.87 | <.0001  |
|                                                             |        |       |       | Target condition*Trait       | 2    | 7.811   | 3.906   | 218.23  | <.0001  |
|                                                             |        |       |       | Trait*S model                | 4    | 0.783   | 0.196   | 10.94   | <.0001  |
|                                                             |        |       |       | Target condition*CV strategy | 2    | 0.300   | 0.150   | 8.37    | 0.0002  |
|                                                             |        |       |       | CV strategy*S model          | 4    | 0.300   | 0.075   | 4.20    | 0.0022  |
|                                                             |        |       |       | Target condition*S model     | 2    | 0.003   | 0.002   | 0.09    | 0.9169  |

878 R<sup>2</sup>: Coefficient of determination; CV: Coefficient of variation; RMSE: Root mean square error; Mean: Intercept  
 879 value of the transformed accuracy (Z); DF: Degree of freedom; SS: Sum of squares; MS: Mean square.
